# Supplementary material for: Whole Genome Assembly of the Snout Otter Clam, Lutraria rhynchaena, Using Nanopore and Illumina Data, Benchmarked Against Bivalve Genome Assemblies
Source: PubMed Central journal article supplement (PMC6880199; doi:10.3389/fgene.2019.01158), 2019-11-20
Supplement: DataSheet_2.pdf [file DataSheet_2.pdf]

## Comparisons of published bivalve genome assemblies.

| Order     | Family     | Species                            | Assembly size (bp) | Number of scaffolds | Scaffold N <sub>50</sub> length (bp) | Longest scaffold (bp) | Shortest scaffold (bp) † | Sequencing Technology | Published studies          |
|-----------|------------|------------------------------------|--------------------|---------------------|--------------------------------------|-----------------------|--------------------------|-----------------------|----------------------------|
| Arcida    | Arcidae    | <i>Scapharca broughtonii</i>       | 884,566,040        | 1,026               | 44,995,656                           | 55,667,740            | 2,698                    | PE, PB, ONT, Hi-C     | Bai et al. (2019)          |
| Mytilida  | Mytilidae  | <i>Bathymodiolus platifrons</i>    | 1,658,191,953      | 65,662              | 343,341                              | 2,790,175             | 292                      | PE, MP                | Sun et al. (2017)          |
|           |            | <i>Limnoperna fortunei</i>         | 1,673,223,206      | 20,580              | 309,123                              | 2,720,304             | 558                      | PE, MP, PB            | Uliano-Silva et al. (2017) |
|           |            | <i>Modiolus philippinarum</i>      | 2,629,556,424      | 74,573              | 100,161                              | 715,382               | 205                      | PE, MP                | Sun et al. (2017)          |
|           |            | <i>Mytilus galloprovincialis</i>   | 1,836,276,477      | 1,188,859           | 3,074                                | 67,529                | 200                      | PE                    | Murgarella et al. (2016)   |
| Ostreida  | Ostreidae  | <i>Crassostrea gigas</i>           | 557,717,710        | 7,658               | 401,685                              | 1,964,558             | 200                      | PE, MP, Fos           | Zhang et al. (2012)        |
|           |            | <i>Saccostrea glomerata</i>        | 788,100,799        | 10,101              | 804,232                              | 7,146,926             | 504                      | PE, MP, Hi-C          | Powell et al. (2018)       |
|           | Pteriidae  | <i>Pinctada fucata</i>             | 972,756,244        | 1,562               | 59,032,463                           | 104,615,532           | 1,737                    | PE, MP, BAC           | Du et al. (2017)           |
| Pectinida | Pectinidae | <i>Argopecten purpuratus</i>       | 724,780,576        | 89,727              | 1,022,003                            | 11,125,544            | 200                      | PE, MP, PB, 10X       | Li et al. (2018)           |
|           |            | <i>Chlamys farreri</i>             | 874,029,444        | 92,847              | 711,029                              | 6,573,047             | 200                      | PE, MP, PB            | Li et al. (2017)           |
|           |            | <i>Patinopecten yessoensis</i>     | 987,568,220        | 82,658              | 803,631                              | 7,498,238             | 200                      | PE, MP                | Wang et al. (2017)         |
| Unionida  | Unionidae  | <i>Venustaconcha ellipsiformis</i> | 1,590,012,607      | 371,427             | 6,657                                | 313,274               | 1001                     | PE, MP, PB            | Renaut et al. (2018)       |
| Venerida  | Mactridae  | <i>Lutraria rhynchaena</i>         | 543,903,147        | 622                 | 2,143,760                            | 13,022,122            | 2,218                    | PE, ONT               | <b>This study</b>          |
|           | Veneridae  | <i>Ruditapes philippinarum</i>     | 2,561,070,351      | 223,851             | 48,447                               | 572,939               | 500                      | PE, MP, TSLR          | Mun et al. (2017)          |

† A length cutoff of 200 bp was applied to all assemblies that included smaller scaffolds.

### Sequencing Technology abbreviations:

PE: Illumina Paired-end short reads  
 MP: Illumina Mate-pair short reads  
 PB: Pacific Biosciences long reads  
 ONT: Oxford Nanopore Technology long reads  
 Hi-C: Hi-C scaffolding (chromosome construction)  
 TSLR: Illumina TruSeq Synthetic Long Read  
 Fos: Fosmid-pooling strategy  
 BAC: BAC sequencing  
 10X: 10X Genomics library
