# Supplementary material for: Whole Genome Assembly of the Snout Otter Clam, Lutraria rhynchaena, Using Nanopore and Illumina Data, Benchmarked Against Bivalve Genome Assemblies
Source: PubMed Central journal article supplement (PMC6880199; doi:10.3389/fgene.2019.01158), 2019-11-20
Supplement: DataSheet_3.pdf [file DataSheet_3.pdf]

**Sequence methods and library kits used in the hybrid assembly of snout otter clam (*L. rhynchaena*) genome**

|                | <b>Platform</b>               | <b>Read length</b> | <b>Number of Reads</b> | <b>Total Bases</b> | <b>Estimated genome coverage</b> |
|----------------|-------------------------------|--------------------|------------------------|--------------------|----------------------------------|
| Genomic        | Illumina (NovaSeq) - PCR-free | 2 × 150bp          | 367,711,652            | 55.16 Gbp          | 100×                             |
|                | Illumina (NovaSeq) - PCR      | 2 × 150bp          | 445,111,088            | 66.77 Gbp          | 121×                             |
|                | ONT (MinION)                  | variable           | 2,830,557              | 14.04 Gbp          | 25×                              |
| Transcriptomic | Illumina (NovaSeq)            | 2 × 150 bp         | 230,852,564            | 34.63 Gbp          | N/A                              |
