# Supplementary material for: Whole Genome Assembly of the Snout Otter Clam, Lutraria rhynchaena, Using Nanopore and Illumina Data, Benchmarked Against Bivalve Genome Assemblies
Source: PubMed Central journal article supplement (PMC6880199; doi:10.3389/fgene.2019.01158), 2019-11-20

# Distribution of genome sizes of bivalve species reported in the Animal Genome Size Database.

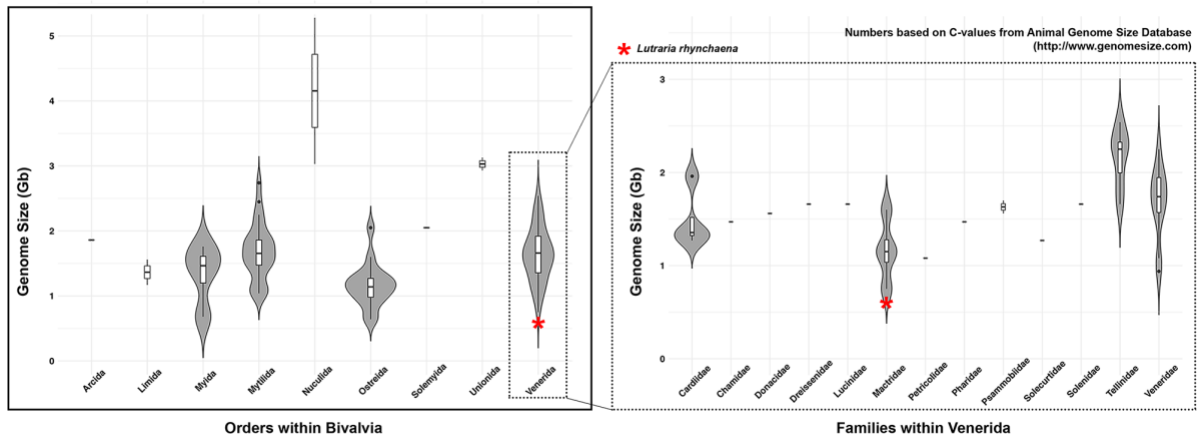

Supplement: DataSheet_5.pdf [file DataSheet_5.pdf]
